# Supplementary material for: Inducting effects of ionic liquid crystal modified-PEDOT:PSS on the performance of bulk heterojunction polymer solar cells
Source: Royal Society of Chemistry journal article supplement (doi:10.1039/c5ra07362f), 2015-01-01
Supplement: c5ra07362f1.pdf [file c5ra07362f1.pdf]

## Supporting Information for

### Inducting Effects of Ionic Liquid Crystals Modified-PEDOT:PSS on the Performance of Bulk Heterojunction Polymer Solar Cells

Xiaofeng Wang<sup>1</sup>, Siwei Hu<sup>1</sup>, Qiujuan Li<sup>1</sup>, Fan Li<sup>\*1</sup>, Kao Yao<sup>2</sup>, Meiyong Shi<sup>3</sup>

<sup>1</sup>Department of Materials Science and Engineering, Nanchang University, 999 Xuefu Avenue, Nanchang 330031, China; <sup>2</sup>Institute of Photovoltaics, Nanchang University, 999 Xuefu Avenue, Nanchang 330031, China; <sup>3</sup>Wanfu Middle School, Ji'an 343100, Jiangxi Province, China

## Materials

4'-hydroxybiphenyl-4-carbonitrile, 1,6-dibromohexadecane, K<sub>2</sub>CO<sub>3</sub>, trimethylamine (NMe<sub>3</sub>), LiF(99.99%), Al(99.998%), poly(3-hexylthiophene) (P3HT, M<sub>w</sub> = 20000, PDI = 2.3), [6,6]-phenyl-C<sub>61</sub>-butyric acid methyl ester (PC<sub>61</sub>BM, 99.9%) and other materials are purchased from Alfa, or Aldrich. Actone and tetrahydrofuran (THF) was dried over sodium. Indium-tin oxide (ITO) glass was purchased from Delta Technologies Limited while PEDOT: PSS (Baytron PA14083) was obtained from Bayer Inc.

## Synthesis of ionic liquid crystals 4'-(N, N, N-trimethyl ammonium bromide hexyloxy)-4-cyanobiphenyl (6CNBP-N)

The synthesis of ionic liquid crystals 4'-(N, N, N-trimethyl ammonium bromide hexyloxy)-4-cyanobiphenyl (6CNBP-N) is outlined in **Scheme 1**. 4'-(n-bromoalky) biphenyl-4-carbonitrile was prepared according to our previously reported method. The second step was carried out according to a reference method. Condensed trimethylamine (5 mL) was added dropwise to a solution of 4'-(n-bromoalky) biphenyl-4-carbonitrile (200mg) in THF (20 mL) at -78 °C. The mixture was allowed to warm to room temperature. The precipitate was re-dissolved by the addition of water (10 mL). After the mixture was cooled to -78 °C, extra trimethylamine (2 mL) was added and the mixture was stirred for 24 h at room temperature. After removing

---

\* Corresponding author. Tel: +86 791 83969553; fax: +86 791 83969329. E-mail address: [lfan@ncu.edu.cn](mailto:lfan@ncu.edu.cn) (F. Li)

most of the solvent, n-hexane was added to precipitate to give the aqueous phase. And then excessive  $\text{NMe}_3$  was removed by reduced pressure. The residue was purified by freeze-drying of the desired material (white power).

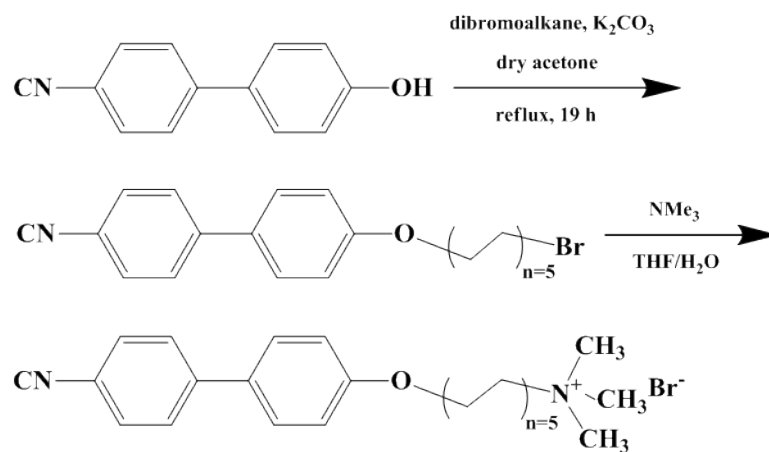

**Scheme S1** Synthesis of 6CNBP-N

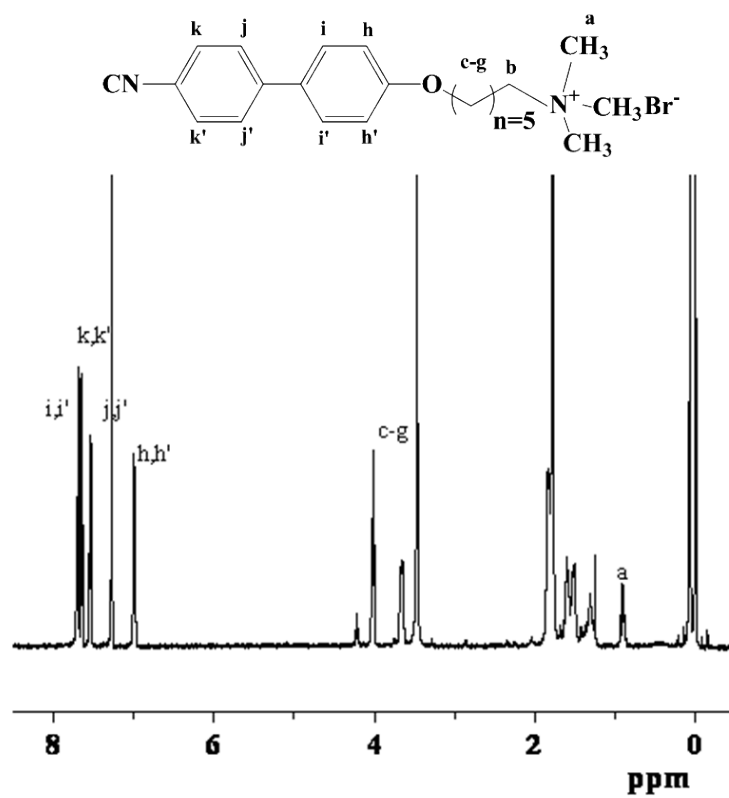

**Figure S1.**  $^1\text{H}$  NMR spectra of 6CNBP-N.

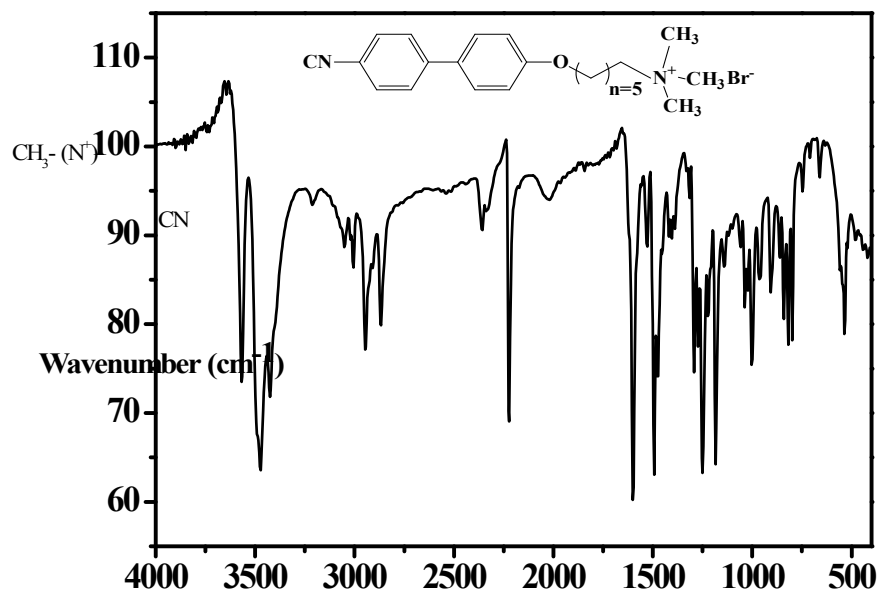

**Figure S2.** FT-IR of 6CNBP-N.

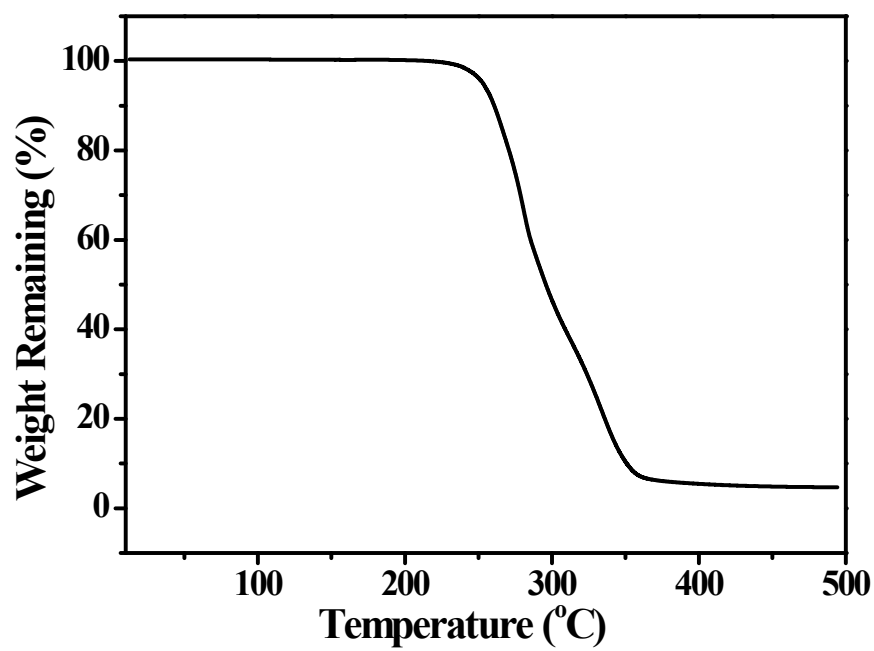

**Figure S3.** TGA thermograms of 6CNBP-N.

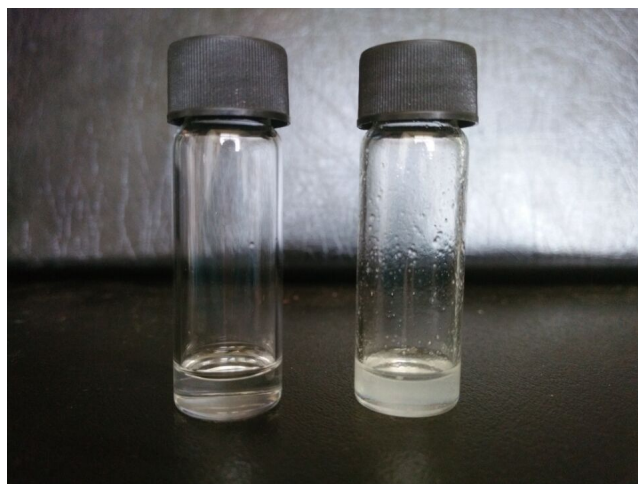

**Figure S4.** Solubility of **6CNBP-N** in mixed methanol and isopropanol (left) and dichlorobenzene (right). The concentration are both 2.14 mg/ml.
